# Supplementary material for: A low-cost paper-based synthetic biology platform for analyzing gut microbiota and host biomarkers
Source: PubMed Central journal article supplement (PMC6104080; doi:10.1038/s41467-018-05864-4), 2018-08-21
Supplement: 41467_2018_5864_MOESM3_ESM.pdf [file 41467_2018_5864_MOESM3_ESM.pdf]

**Supplementary Information for**

**A low-cost paper-based synthetic biology platform for analyzing gut microbiota and host biomarkers**

Takahashi et al.

Table of contents:

|                         | <b>Description</b>                                                   | <b>Page</b> |
|-------------------------|----------------------------------------------------------------------|-------------|
| Supplementary Table 1   | Important DNA sequences                                              | 2           |
| Supplementary Table 2   | 16S sensor and trigger sequences                                     | 3           |
| Supplementary Table 3   | Species specific sensor and trigger sequences                        | 4           |
| Supplementary Table 4   | 16S NASBA primers                                                    | 5           |
| Supplementary Table 5   | Species specific NASBA primers                                       | 6           |
| Supplementary Table 6   | Host biomarker sensor and trigger sequences                          | 7           |
| Supplementary Table 7   | Host biomarker NASBA primers                                         | 8           |
| Supplementary Table 8   | qPCR primers and probes                                              | 9           |
| Supplementary Table 9   | Targeted species specific gene regions                               | 10          |
| Supplementary Table 10  | Host biomarker mRNA standard sequences                               | 12          |
| Supplementary Table 11  | qPCR performance characteristics                                     | 13          |
| Supplementary Figure 1  | 16S toehold switch sensor screen                                     | 14          |
| Supplementary Figure 2  | Chemical structure probing data for <i>E. coli</i> 16S NASBA primers | 15          |
| Supplementary Figure 3  | 16S sensor orthogonality data                                        | 16          |
| Supplementary Figure 4  | <i>C. difficile</i> 16S sensor alignment                             | 17          |
| Supplementary Figure 5  | Species-specific toehold switch sensor function                      | 19          |
| Supplementary Figure 6  | Species-specific sensor orthogonality data                           | 20          |
| Supplementary Figure 7  | Mathematical model of NASBA process                                  | 21          |
| Supplementary Figure 8  | NASBA time courses                                                   | 22          |
| Supplementary Figure 9  | Species-specific bacterial calibration curves                        | 23          |
| Supplementary Figure 10 | mRNA detection in stool RNA background                               | 24          |
| Supplementary Figure 11 | Quantification of species-specific mRNAs in clinical samples         | 25          |
| Supplementary Figure 12 | Host biomarker sensor and NASBA validation                           | 26          |
| Supplementary Figure 13 | Host biomarker calibration curves                                    | 27          |
| Supplementary Figure 14 | <i>C. difficile</i> toxin sensor and NASBA validation                | 28          |
| Supplementary Table 12  | <i>C. difficile</i> toxin DNA pcr results                            | 29          |
| Supplementary Figure 15 | Correlation of <i>E. coli</i> species specific mRNA to cell count    | 30          |
| Supplementary Figure 16 | Demonstration of platform using an in-house cell-free system         | 31          |
| Supplementary Figure 17 | Performance of NASBA reactions using individually mixed components   | 32          |
| Supplementary Note 1    | Toehold switch sensor design script                                  | 33          |
| Supplementary Note 2    | Description of NASBA mathematical model                              | 34          |

**Supplementary Table 1: Important DNA sequences**

|               | <b>Sequence</b>                                                                                                                                                                                                                                                                                                                                                                                                                                                                                                                                                                                                                                                                                                                                             |
|---------------|-------------------------------------------------------------------------------------------------------------------------------------------------------------------------------------------------------------------------------------------------------------------------------------------------------------------------------------------------------------------------------------------------------------------------------------------------------------------------------------------------------------------------------------------------------------------------------------------------------------------------------------------------------------------------------------------------------------------------------------------------------------|
| T7 promoter   | taatcgactcactatagg                                                                                                                                                                                                                                                                                                                                                                                                                                                                                                                                                                                                                                                                                                                                          |
| T7 terminator | ctagcataacccttggggcctctaaacgggtcttgaggggtttttg                                                                                                                                                                                                                                                                                                                                                                                                                                                                                                                                                                                                                                                                                                              |
| Linker        | aacctggcggcagcgcaaaaag                                                                                                                                                                                                                                                                                                                                                                                                                                                                                                                                                                                                                                                                                                                                      |
| GFPmut3b      | atgCGTAAAGGAGAAGAacttttCactggagttgtCCCAattcttGTTgaattagatggTgatGTTaatgggcacaaa<br>tttctgtcagtggagaggggtgaaggtgatgcaacatacggaaaacttaccctaaattattgcactactggaaa<br>actacctgtccgtggccaacactgtcactactttcggttatggtgtcaatgctttgcgagataccagatcacatg<br>aacagcatgacttttcaagagtccatgccgaaggttacgtacaggaagaactatattttcaaagatgac<br>gggaactacaagacacgtgctgaagtcaagttgaaggtgataccctgttaatagaatcgagttaaaaggtattg<br>atttaagaagatggaacattctggacacaaattggaatacaactataactcacacaatgtatacatcatggc<br>agacaaaacaaaagaatggaatcaaagttaactcaaaaattagacacaacattgaagatggaagcgttcaacta<br>gcagaccattatcaacaaaatactccgattggcgtatggcctgtcctttaccagacaaccattacctgtccacac<br>aatctgcccttgcgaaagatcccaacgaaaagagagaccacatggtccttcttgagttgtaaccgctgctgggat<br>tacacatggcatggatgaactatacaaaa |

**Supplementary Table 2: 16S sensor and trigger sequences**

| <b>Bacteria</b>            | <b>Addgene ID</b> | <b>Sensor sequence</b>                                                                 | <b>Trigger sequence</b>                          |
|----------------------------|-------------------|----------------------------------------------------------------------------------------|--------------------------------------------------|
| <i>B. fragilis</i>         | 110696            | GCTTATTCATATAATACATACAAAACA<br>GTATACATACGGACTTTAGAACAGAG<br>GAGATAAAGATGGTATGTATACTG  | GTATGTATACTG<br>TTTTGTATGTATT<br>ATATGAATAAG     |
| <i>B. thetaiotaomicron</i> | 110697            | GCAAAATTCCACACGTGGAAAAC TTT<br>ATTCCCATATAGGACTTTAGAACAGA<br>GGAGATAAAGATGTATATGGGAATT | TATATGGGAATA<br>AAGTTTTCCACG<br>TGTGGAATTTTG     |
| <i>E. coli</i>             | 110698            | GAACGTCAATGAGCAAAGGTATTAAC<br>TTTACTCCCTTGGACTTTAGAACAGA<br>GGAGATAAAGATGAAGGGAGTAAAG  | AAGGGAGTAAAG<br>TTAATACCTTTGC<br>TCATTGACGTT     |
| <i>B. longum</i>           | 110699            | GGGTGCTTATTCAACGGGTAAACTCA<br>CTCTCGCTTGCGGACTTTAGAACAGA<br>GGAGATAAAGATGGCAAGCGAGAGC  | GCAAGCGAGAGT<br>GAGTTTACCCGT<br>TGAATAAGCACC     |
| <i>B. adolescentis</i>     | 110700            | GCGAAGGGCTTGCTCCCAGTCAAAA<br>GCGGTTTACAACGGACTTTAGAACAG<br>AGGAGATAAAGATGGTTGTAAACCGA  | GTTGTAAACCGC<br>TTTTGACTGGGA<br>GCAAGCCCTTCG     |
| <i>B. breve</i>            | 110701            | GAAGTGCCTTGCTCCCTAACAAAAGA<br>GGTTTACAACCGGACTTTAGAACAGA<br>GGAGATAAAGATGGGTTGTAAACCA  | GGTTGTAAACCT<br>CTTTTGTAGGG<br>AGCAAGGCACTT      |
| <i>E. rectale</i>          | 110702            | GTCATTATCTTCCCTGCTGATAGAGC<br>TTTACATACCGGACTTTAGAACAGA<br>GGAGATAAAGATGCGGTATGTAAAC   | CGGTATGTAAAG<br>CTCTATCAGCAG<br>GGAAGATAATGA     |
| <i>R. hominis</i>          | 110703            | GCATTCTTCTTCCCTGCTGATAGAGC<br>TTTACATACCGGACTTTAGAACAGA<br>GGAGATAAAGATGCGGTATGTAAAT   | CGGTATGTAAAG<br>CTCTATCAGCAG<br>GGAAGAAGAATG     |
| <i>C. difficile</i>        | 110704            | GGCCGGGGCTTCTCCTCAAGTACC<br>GTCATTATCTTCCGACTTTAGAACAG<br>AGGAGATAAAGATGGAAGATAATGAC   | GAAGATAATGAC<br>GGTACTTGAGGA<br>GGAAGCCCCGG<br>C |
| <i>F. prausnitzii</i>      | 110705            | GCGTCATTATCTTCCCTCAACAACAGG<br>AGTTTACAATCGGACTTTAGAACAGA<br>GGAGATAAAGATGGATTGTAAACTA | GATTGTAAACTC<br>CTGTTGTTGAGG<br>AAGATAATGACG     |

**Supplementary Table 3: Species-specific sensor and trigger sequences**

| <b>Bacteria</b>             | <b>Addgene ID</b> | <b>Sensor sequence</b>                                                                 | <b>Trigger sequence</b>                       |
|-----------------------------|-------------------|----------------------------------------------------------------------------------------|-----------------------------------------------|
| <i>B. fragilis</i>          | 110706            | GATATCTTCTGCTTCCTGAATTATTAT<br>TGGGTCCGTTGGACTTTAGAACAGAG<br>GAGATAAAGATGAACGGACCCAAG  | AACGGACCCAATA<br>ATAATTCAGGAAG<br>CAGAAGATAT  |
| <i>B. thetaiotaomicron</i>  | 110707            | GTTACTGTATGACCGGCTTTGTGTGG<br>TGTTGCTCCTTGGACTTTAGAACAGA<br>GGAGATAAAGATGAAGGAGCAACAC  | AAGGAGCAACACC<br>ACACAAAGCCGGT<br>CATACAGTAA  |
| <i>E. coli</i>              | 110708            | GCGGTTCAAACGTGGAACGAAATAG<br>ATATCCGTCTTGGACTTTAGAACAGA<br>GGAGATAAAGATGAAGACGGATATC   | AAGACGGATATCT<br>ATTTGTTTTCCAC<br>GTTTGAACCG  |
| <i>B. longum</i>            | 110709            | GATATCTTCTGCTTCCTGAATTATTAT<br>TGGGTCCGTTGGACTTTAGAACAGAG<br>GAGATAAAGATGAACGGACCCAAG  | GTAGATAAGGCGC<br>TGAACATTGATGC<br>ACAAGAACCT  |
| <i>B. adolescentis</i>      | 110710            | GGCAAACAAGGCGCATAAGGAAGG<br>AAATACCTGAATGGACTTTAGAACAG<br>AGGAGATAAAGATGATTCAGGTATTA   | ATTCAGGTATTTT<br>CTTCCTTATGCGC<br>CTTTGTTTGC  |
| <i>B. breve</i>             | 110711            | GTAACCGCCTGATTGAACGCGGCAAT<br>GTCAGTCCTGCGGACTTTAGAACAGA<br>GGAGATAAAGATGGCAGGACTGACA  | GCAGGACTGACAT<br>TGCCGCGTTCAAT<br>CAGGCGGTTA  |
| <i>E. rectale</i>           | 110712            | GGAAGGAAATGATGAGTCAAACGGTA<br>TCTTTACAATAGGACTTTAGAACAGA<br>GGAGATAAAGATGTATTGTAAAGAG  | TATTGTAAAGATA<br>CCGTTTGACTCAT<br>CATTTCCCTTC |
| <i>R. hominis</i>           | 110713            | GAGCTTGTCCATATCCGCCTTCTCAA<br>AGCTCTTCTCGGACTTTAGAACAGA<br>GGAGATAAAGATGCGAGAAGAGCTC   | CGAGAAGAGCTTT<br>GAGAAGGCGGAT<br>ATGGACAAGCT  |
| <i>C. difficile</i>         | 110714            | GCCATTATAGCCATTCCACTTATACAT<br>GCAATTGTTGCGGACTTTAGAACAGAG<br>GAGATAAAGATGGAACAATTGCAG | GAACAATTGCATG<br>TATAAGTGGAAATG<br>GCTATAATGG |
| <i>C. difficile</i> toxin B | 110715            | GTGTTTTTTCAGTTTCTACAAATATAG<br>ATTCTCCAGTGGACTTTAGAACAGAG<br>GAGATAAAGATGACTGGAGAATCT  | ACTGGAGAATCTA<br>TATTTGTAGAAAC<br>TGAAAAACA   |
| <i>F. prausnitzii</i>       | 110717            | GAAACGCACAGCAGCCAAACTTCAC<br>AGGGTTTGACCGGACTTTAGAACAGA<br>GGAGATAAAGATGGGTCAAACCCTT   | GGTCAAACCCTGT<br>GAAGTTTGGGCTG<br>CTGTGCGTTT  |

**Supplementary Table 4: 16S NASBA primers**

| <b>Bacteria</b>            | <b>Forward primer</b>                                       | <b>Reverse primer</b>        |
|----------------------------|-------------------------------------------------------------|------------------------------|
| <i>B. fragilis</i>         | aattctaatacgactcactataggagaaggGG<br>ATGAAGGCTCTATGGGTCGT    | TATTACCGCGGCTGCTGGCA         |
| <i>B. thetaiotaomicron</i> | aattctaatacgactcactataggagaaggAA<br>GGATGACTGCCCTATGGGTT    | ATCCTTATTCATATGGTACATA       |
| <i>E. coli</i>             | aattctaatacgactcactataggagaaggTA<br>TGAAGAAGGCCTTCGGGT      | GTGCTTCTTCTGCGGGTAAACGT      |
| <i>B. longum</i>           | aattctaatacgactcactataggagaaggAG<br>GGATGGAGGCCTTCGGGT      | AGCCGGTGCTTATTCAACGGG<br>TAA |
| <i>B. adolescentis</i>     | aattctaatacgactcactataggagaaggAT<br>GACGGCCTTCGGGTTGTAAACC  | TATTACCGCGGCTGCTGGCA         |
| <i>B. breve</i>            | aattctaatacgactcactataggagaaggAG<br>GGATGGAGGCCTTCGGGT      | TATTACCGCGGCTGCTGGCA         |
| <i>E. rectale</i>          | aattctaatacgactcactataggagaaggAG<br>CGAAGAAGTATTTTCGGTAT    | GTGCTTCTTAGTCAGGTACCGT       |
| <i>R. hominis</i>          | aattctaatacgactcactataggagaaggAG<br>AAGTATTTTCGGTATGTAAAGCT | TCACATCAGACTTGCCGTACCG       |
| <i>C. difficile</i>        | aattctaatacgactcactataggagaaggAC<br>TCTGTCCTCAAGGAAGATAATGA | TATTACCGCGGCTGCTGGCA         |
| <i>F. prausnitzii</i>      | aattctaatacgactcactataggagaaggCG<br>TGGAGGAAGAAGGTCTTCGGAT  | AGTAATTCCGGACAACGCTTGT       |

**Supplementary Table 5: Species-specific NASBA primers**

| <b>Bacteria</b>             | <b>Forward primer</b>                                                 | <b>Reverse primer</b>                |
|-----------------------------|-----------------------------------------------------------------------|--------------------------------------|
| <i>B. fragilis</i>          | aattctaatacgcactactatagggagagaaTT<br>CAGATCGTAACGGACCCAAT             | TCCTGTCCCAGTGATGATTTCT               |
| <i>B. thetaiotaomicron</i>  | aattctaatacgcactactatagggagaaggC<br>CGACTTCGGAACGCTTATAGA             | TGAAACGTATGCGGTAGCTGAA               |
| <i>E. coli</i>              | aattctaatacgcactactatagggagaaggC<br>AAACTACGACGTCATCATTTAGC           | GTTGACGGTTCAAACGTGGAAA               |
| <i>B. longum</i>            | aattctaatacgcactactatagggagaaggA<br>GCTCGCTGATGGCAGTGTGGTA            | TTTCTCCCGCAATAACGTTGAAG              |
| <i>B. adolescentis</i>      | aattctaatacgcactactatagggagaaggTT<br>TACCTTGCCTTGTGACTGCAATA          | CCGATTCCAACATTACGAATGCAA<br>A        |
| <i>B. breve</i>             | aattctaatacgcactactatagggagaagaG<br>GAAGCCGAACCTTGAACG                | AGCGGTGCAGTATGGGCGTA                 |
| <i>E. rectale</i>           | aattctaatacgcactactatagggagaaggG<br>TCGACAGATTGAGACCATGTCA            | TAACGTGTGTCCCGAAGGAAAT               |
| <i>R. hominis</i>           | aattctaatacgcactactatagggagaaggG<br>AGCGAATGAGAAGACGTTGGA             | CGTGCGTTGTAAACAGTGACTT               |
| <i>C. difficile</i>         | aattctaatacgcactactatagggagaaggAA<br>TGCTGATAGGGTGTTCGTT              | TCAAGCATACACAATATTACCATT<br>ATAGCCA  |
| <i>C. difficile</i> toxin B | aattctaatacgcactactatagggagaaggAG<br>ATTCTCATTTTATATCTTTTGAGG<br>ACAT | ATTAGCATATTCAGAGAATATTGT<br>TTTTTCAG |
| <i>F. prausnitzii</i>       | aattctaatacgcactactatagggagaagaT<br>GACTTGCGGCTATAATAGAAACG           | TATTCAAAACGCACAGCAGCCC<br>A          |

**Supplementary Table 6.** Host biomarker sensor and trigger sequences

| <b>Gene</b>                   | <b>Addgene ID</b> | <b>Sensor sequence</b>                                                                 | <b>Trigger sequence</b>                      |
|-------------------------------|-------------------|----------------------------------------------------------------------------------------|----------------------------------------------|
| Calprotectin<br><i>S100A9</i> | 110717            | GTGGTGGAAAGGTGTTGATGATGGTCT<br>CTATGTTGCGTGGACTTTAGAACAGA<br>GGAGATAAAGATGACGCAACATAGT | ACGCAACATAGAG<br>ACCATCATCAACA<br>CCTTCCACCA |
| <i>CXCL5</i>                  | 111907            | GCATGCGTGCTCATTCTCTTAATCA<br>GTTTTCTTGTGGACTTTAGAACAGA<br>GGAGATAAAGATGACAAGGAAAACA    | ACAAGGAAAAGT<br>ATTAAGAGAAATG<br>AGCACGCATG  |
| <i>IL-8</i>                   | 111908            | GAAAGCTTTACAATAATTTCTGTGTTG<br>GCGCAGTGTGGGACTTTAGAACAGA<br>GGAGATAAAGATGCACACTGCGCCT  | CACACTGCGCCAA<br>CACAGAAATTATT<br>GTAAAGCTTT |
| <i>Oncostatin M</i>           | 111909            | GAGTAGATGTTGTTCTGAGCCCGAG<br>GATGTTCCGGCCGGACTTTAGAACAGA<br>GGAGATAAAGATGGGCCGAACATCC  | GGCCGAACATCCT<br>CGGGCTCAGGAA<br>CAACATCTACT |



**Supplementary Table 7.** Host biomarker NASBA primers

| <b>Gene</b>                   | <b>Forward primer</b>                                            | <b>Reverse primer</b>  |
|-------------------------------|------------------------------------------------------------------|------------------------|
| Calprotectin<br><i>S100A9</i> | aattctaatacgactcactatagggagaagGG<br>CTTTGACAGAGTGCAAGACGATG<br>A | GTGCCCCAGCTTCACAGAGTAT |
| <i>CXCL5</i>                  | attctaatacgactcactatagggagaagGTC<br>ATCCAGAAAATTTTGGACGG         | TCTCTGCTGAAGACTGGGAAAC |
| <i>IL-8</i>                   | aattctaatacgactcactatagggagaagGC<br>CAAGGAGTGCTAAAGAACTTA        | GGGTCCAGACAGAGCTCTCTT  |
| <i>Oncostatin M</i>           | attctaatacgactcactatagggagaagTGA<br>ACATCGAGGACTTGGAGAA          | TGAGTTGTCCAGCAGCTG     |

**Supplementary Table 8: qPCR primers and probes**

| <b>Bacteria</b>                               | <b>Forward primer</b>                                  | <b>Reverse primer</b>               | <b>Probe</b>                                                        |
|-----------------------------------------------|--------------------------------------------------------|-------------------------------------|---------------------------------------------------------------------|
| <i>B. fragilis</i>                            | GGCAGCGTATTAAG<br>AGCCGTTT                             | GCCTGAGTTTGGT<br>GGTAATATCTTCT<br>G | /56-<br>FAM/AACGCTCGC/ZEN/CCTC<br>GTCAGGTTTCAGATCGT/3IABk<br>FQ/    |
| <i>B. thetaiotaomicron</i>                    | CCGACTTCGGAACG<br>CTTATAGA                             | TGAAACGTATGCG<br>GTAGCTGAA          | /56-<br>FAM/AGGAGCAAC/ZEN/ACCA<br>CACAAAGCCGGTCA/3IABkFQ<br>/       |
| <i>E. coli</i>                                | CGGATATCTATTTCCG<br>TTTCC                              | GTCAGCATATTCA<br>CATACC             | /56-<br>FAM/AACCGTGAG/ZEN/CAAA<br>TCGACCGA/3IABkFQ/                 |
| <i>B. longum</i>                              | AGCTCGCTGATGGC<br>AGT                                  | AGCCACTGTTGTT<br>ATCGTTCAATGC       | /56-<br>FAM/ACTTGCGCG/ZEN/TCAA<br>CAGGTTCTTGTGCATCA/3IAB<br>kFQ/    |
| <i>B. adolescentis</i>                        | ATCATGATTGCCGC<br>GTGTTG                               | TTCTTTTCGGCGGC<br>TTTTGAC           | /56-<br>FAM/AGTCGTGTT/ZEN/GGCT<br>GTGACCAGTGTGGTGA/3IABk<br>FQ/     |
| <i>E. rectale</i>                             | AGGCGTATTGTGGA<br>TTGTG                                | TTGCCCACTATAA<br>AGCTCAAA           | /56-<br>FAM/AAGCATCTG/ZEN/CATA<br>CCTCCACGACGGT/3IABkFQ/            |
| <i>R. hominis</i>                             | GGGCATTACCGTGG<br>ATGC                                 | GACTTCAGCTTGT<br>CCATATCCG          | /56-<br>FAM/CGACGGCAG/ZEN/ACTT<br>TCCGTGGACGAGAA/3IABkFQ<br>/       |
| <i>C. difficile (toxin B)</i>                 | AGACTGATGAGGGA<br>TTTAG                                | CTCTTCAGTTATA<br>TGATTAGCA          | /56-<br>FAM/AAAGAACT/ZEN/GGAG<br>AATCTATATTTGTAGAACTG<br>A/3IABkFQ/ |
| <i>F. prausnitzii</i>                         | GAAAACGTTGACTTG<br>CGGCTAT                             | CTATTCCAAAACG<br>CACAGCAG           | /56-<br>FAM/CTTCACAGG/ZEN/GTTT<br>GACCGCCTATCGCAGAA/3IA<br>BkFQ/    |
| <i>H. sapiens<br/>Calprotectin<br/>S100A9</i> | ATGCTGATGGCGAG<br>GCTAA                                | CGAGGCCTGGCT<br>TATGG               | /56-<br>FAM/TCCCACGAG/ZEN/AAGA<br>TGCACGAGGGTGAC/3IABkF<br>Q/       |
| <i>H. sapiens CXCL5</i>                       | CCGCTGCTGTGTTG<br>AGAG                                 | CCTATGGCGAACA<br>CTTGACAGATTAC      | /56-<br>FAM/AGCTGCGTT/ZEN/GCGT<br>TTGTTTACAGACCACGC/3IAB<br>kFQ/    |
| <i>H. sapiens IL-8</i>                        | AAACCACCGGAAGG<br>AACCA                                | GCTGCAGAAATCA<br>GGAAGGC            | /56-<br>FAM/AGCCACGGC/ZEN/CAG<br>CTTGAAGTCATGT/3IABkFQ/             |
| <i>H. sapiens<br/>Oncostatin M</i>            | Proprietary commercially available assay, see methods. |                                     |                                                                     |

**Supplementary Table 9:** Targeted species-specific gene regions (NASBA standard sequences)

| Bacteria                  | Gene                                                                  | Sequence                                                                                                                                                                                                                                                                                                                                                                                                                                                                                                                                                                                                                                                                                                                                     |
|---------------------------|-----------------------------------------------------------------------|----------------------------------------------------------------------------------------------------------------------------------------------------------------------------------------------------------------------------------------------------------------------------------------------------------------------------------------------------------------------------------------------------------------------------------------------------------------------------------------------------------------------------------------------------------------------------------------------------------------------------------------------------------------------------------------------------------------------------------------------|
| <i>B. fragilis</i>        | DUF4834 domain-containing protein                                     | ATGTTTCACATTTT TAGGATTTT TATTCATTATTGTCATAGCC<br>GTTATAATCATCGGATTGGCCCTTGTAGGCAGCGTATTAAG<br>AGCCGTTTTTCGGACTTGGAAAACGCTCGCCCTCGTCAGGT<br>TCAGATCGTAACGGACCCAATAATAATTCAGGAAGCAGAAG<br>ATATTACCACCAAACCTCAGGCTAATGATAAAGAAGAAATCA<br>TCACTGGGACAGGAG                                                                                                                                                                                                                                                                                                                                                                                                                                                                                        |
| <i>B. thetaiotaomicon</i> | hypothetical protein SAMN029103.22_01913                              | ATGCATGCATACATTATCCAACAAC TAACAAGAATTATATTG<br>TTTATCACTATCGGTTTGCCTATAGGACTAAAAAGTTTTGCC<br>CAAGAAACAAAACGTTTCTATATGGAAC TGGACACTCCCCG<br>CAATGGAGCCAAAGCAGGACAAGAGCTTGAATTA AAAATACA<br>TCAGCACAGCCGATTTCTGATTCTGTATCTCCACCCGACTTC<br>GGAACGCTTATAGAAACAGTTGAAGGAGCAACACCACACA<br>AAGCCGGTCATACAGTAAAAACGGCATTATTGACAGATATC<br>TACGAGCAGGGATT CAGCTACCGCATA CGTTTCAAGAAGC<br>CAGGAAACACCAAAC TACCTCTGGCATCCATCAAGGCAA<br>CGGAAAGGAATACGAAACACCTCTGACCAGTGTATGGGTA<br>CATCCGGTCGATACCAATATCGACAGTGTAAAATGCAGCAT<br>TCAGCTGGAGGATTCTTATCGCAAAGGAGTTTTCACTGCCA<br>TCGGGATCTGTCTCTTAATCGCCTGTTATTGATCCGCTTA<br>TCGTTTCAGAAACAAAAAATAAAGAGACAGGATAA                                                                                             |
| <i>E. coli</i>            | AraC family transcriptional regulator                                 | TCAAAC TACGACGTCATCATTTAGCCAGATGTATGAAGAAT<br>TTTAAGACGGATATCTATTTTCGTTTCCACGTTTGAACCGTCA<br>ACAAAATCGGTTCGATTTGCTCACGGTTGAAACTTTTGCTGG<br>TACGGTATGTGAATATGCTGACATGCCAAAAGAGTGGACA                                                                                                                                                                                                                                                                                                                                                                                                                                                                                                                                                          |
| <i>B. longum</i>          | hypothetical protein (L,D-transpeptidase catalytic domain-containing) | CCGCAATCAATCCC GAGCTCGCTGATGGCAGTGTGGTAG<br>ATAAGGCGCTGAACATTGATGCACAAGAACCTGTTGACGC<br>GCAAGTCGCATTGAACGATAACAACAGTGGCTTCAACGTTA<br>TTGCGGGAGAAAATGGCCAGGGAGCCAACGCCACCAGCA<br>TTGCGAAGCAAGCCATTTCCACAGTGGAGTCATTGGGCAG<br>TGTCCAGCCACAGACCGTTCCGGGTGGAAC TCGACGTA                                                                                                                                                                                                                                                                                                                                                                                                                                                                          |
| <i>B. adolescentis</i>    | hypothetical protein LU08_05010 (DUF2142 domain containing)           | ATGTGCAAGTTTGTGTACATGCCATTGGTTTTGCTGGTTATT<br>CCGTTGATGTTT GATCGAGTTTCCGGTCGCTGGCGTGTGA<br>ATCGTGGTCGGGCTGTGCCATTGTTGATAGGCGTGGTTGC<br>GTCTGGTATATGGACCATATTCTGTTGGGCGTCAATGCTT<br>GGTATACGAATTGTCCGATGCTGGTTTCGTACAAACAAATG<br>AGCGAGCGCAAGCATGCATTGTTGACGGATCCCGTTGCCA<br>TGTGGATGCTGTGAAGAACATTGCATGGGCGATAATGCAT<br>GCTCAATCGAATATGAATAACAGGACGGACAGCATCATGAT<br>TGCCGCGTGTGGTTGGCAATTGTGGTTTCCGTAGTCGTG<br>TTGGCTGTGACCAGTGTGGTGAATGCTTGTGTCAAAGCC<br>GCCGAAAGAATCCGTTAGGACTGCCAATGGTTCTATAAAT<br>GCATGCGGTGTGCTTTCCTTACCATACGCATGGTTGATCGC<br>GGTGGTCTGTATCGGAGATATCCTACTGATTTACCTTGCTT<br>TGTGACTGCAATACGATGCGGATGGGCTAATCGGAGTCGA<br>CGGTATGCAATTCAGGTATTTCTTCTTATGCGCCTTTGTT<br>TGCATTTCGTAATGTTGGAATCGGGAAGGCGGTTGCTGAAA<br>CAGTGA |

|                       |                                                  |                                                                                                                                                                                                                                                                                                                                                                                                                                                                                                                                                              |
|-----------------------|--------------------------------------------------|--------------------------------------------------------------------------------------------------------------------------------------------------------------------------------------------------------------------------------------------------------------------------------------------------------------------------------------------------------------------------------------------------------------------------------------------------------------------------------------------------------------------------------------------------------------|
| <i>E. rectale</i>     | phosphatase<br>PAP2 family<br>protein            | ATGGACTGGGAATTTGACATCCTATATGCAATTCAGAGCAT<br>CAGAACACCGTTTTTAGACAAGCTAATGGCGTTTTTATCCA<br>CCATCGGAAATGCAGGCGTATTGTGGATTGTGATAGGTGT<br>AGTGCTTTGTATTTCAAAAAAATACCGTCGTGGAGGTATGC<br>AGATGCTTTTCGGCAGAGCTTTTGTAGCTTTATAGTGGGCAAT<br>CTGATAATAAAAAATATGGTTCGACAGATTGAGACCATGTCA<br>GATAGATAAGACAGTCAGTCTTATTGTAAAGATAACCGTTTG<br>ACTCATCATTTCTTCGGGACACACGTTAAACGGCATAACA<br>GCGGCAGTGACACTTATGTTTTAT                                                                                                                                                           |
| <i>R. hominis</i>     | hypothetical<br>protein                          | ATTCCACGGACAGCGCCACGAAGGTCAGCCCGTCGATCTC<br>AACC CGAAGGATGACGCGAAGACACTGACCCGGATTGAG<br>AGTGCGGCGGAGAGTACGGAGAAGTCGCTTTCCAAGCTGA<br>CAGCAACCGGAAAGGATTCTGTGTTCAACAAAGTGGAGAA<br>GACCGCGGAGGACGGCACGAAGACGCAGGAGTATGACCG<br>TGATGCCATCTATAAGGCGGTGAAGTCGTATGTGGATGATT<br>ACAATTCAGTCTGGATCGGGCGGACGATTCTAAGACGAA<br>GAGCATTCTGCGTGCGGCGAACTCTTTGAAGAGCAACGCC<br>AGAGCGAATGAGAAGACGTTGGAGAAAGCGGGCATTACCG<br>TGGATGCCGACGGCAGACTTTCCGTGGACGAGAAGAGCTT<br>TGAGAAGGCGGATATGGACAAGCTGAAGTCACTGTTTACA<br>ACGCACGGATCTTATGCGACGCAGACGAATGTGGATCTCC<br>TGAAGATCGCATC |
| <i>C. difficile</i>   | toxin B ( <i>tcdB</i> )                          | AGACTGATGAGGGATTTAGTATAAGATTTATTAATAAAGAAA<br>CTGGAGAATCTATATTTGTAGAACTGAAAAACAATATTCT<br>CTGAATATGCTAATCATATAACTGAAGAG                                                                                                                                                                                                                                                                                                                                                                                                                                      |
| <i>F. prausnitzii</i> | hypothetical<br>protein<br>FAEPRAA216<br>5_01415 | ATGAAAAATACGGAAAACTTGACAAAACGCTTGAGAAAAC<br>GTTGACTTGCGGCTATAATAGAAACGTGTTATTCTGCGATA<br>GGCGGTCAAACCTGTGAAGTTTGGGCTGCTGTGCGTTTT<br>GGAATAG                                                                                                                                                                                                                                                                                                                                                                                                                  |

**Supplementary Table 10.** Host biomarker mRNA standard sequences

| Gene                          | mRNA standard sequence                                                                                                                                                                                                                                                                                                                                                                                                                                                                                                                                                                                                                                                                                     |
|-------------------------------|------------------------------------------------------------------------------------------------------------------------------------------------------------------------------------------------------------------------------------------------------------------------------------------------------------------------------------------------------------------------------------------------------------------------------------------------------------------------------------------------------------------------------------------------------------------------------------------------------------------------------------------------------------------------------------------------------------|
| Calprotectin<br><i>S100A9</i> | CTCTGTGTGGCTCCTCGGCTTTGACAGAGTGCAAGACGATGACTTG<br>CAAAATGTTCGAGCTGGAACGCAACATAGAGACCATCATCAACACC<br>TTCCACCAATACTCTGTGAAGCTGGGGCACCCAGACACCCTGAACC<br>AGGGGGAATTCAAAGAGCTGGTGCGAAAAGATCTGCAAATTTTCT<br>CAAGAAGGAGAATAAGAATGAAAAGGTCATAGAACACATCATGGAG<br>GACCTGGACACAAATGCAGACAAGCAGCTGAGCTTCGAGGAGTTCA<br>TCATGCTGATGGCGAGGCTAACCTGGGCCTCCCACGAGAAGATGC<br>ACGAGGGTGACGAGGGGCCCTGGCCACCACCATAAGCCAGGCCTCG<br>GGGAGGGCACCCCTAAGACCACAGTGGCCAAGATCACAGTGGCC<br>ACGGCCACGGCCACAGTCATGGTGGCCACGGCCACAGCCACTAAT<br>CAGGAGGCCAGGCCACCCTGCCTCTACCCAACCAGGGCCCCGGG                                                                                                                                                |
| <i>CXCL5</i>                  | ATGAGCCTCCTGTCCAGCCGCGCGGCCCGTGTCCCCGGTCCCTCG<br>AGCTCCTTGTGCGCGCTGTTGGTGTCTGCTGCTGCTGCTGACGCAG<br>CCAGGGCCCATCGCCAGCGCTGGTCTCGCCGCTGCTGTGTTGAGA<br>GAGCTGCGTTGCGTTTGTACAGACCACGCAAGGAGTTCATCCCA<br>AAATGATCAGTAATCTGCAAGTGTTCGCCATAGGCCACAGTGCTC<br>CAAGGTGGAAGTGGTAGCCTCCCTGAAGAACGGGAAGGAAATTTGT<br>CTTGATCCAGAAGCCCCTTTTCTAAAGAAAGTCATCCAGAAAATTT<br>GGACGGTGGAAACAAGGAAAAGTATTAAGAGAAATGAGCACGCAT<br>GAAAAGTTTCCAGTCTTCAGCAGAGAAGTTTTCTGGAGGTCTCT<br>GAACCCAGGGAAGACAAGAAGGAAAGATTTTGTGTTGTTTGTAT<br>TTGTTTTTCCAGTAGTTAGCTTTCTTCTGGATTCCTCACT                                                                                                                                                         |
| <i>IL-8</i>                   | GAGGGTGCATAAGTTCTCTAGTAGGGTGATGATATAAAAAGCCACC<br>GGAGCACTCCATAAGGCACAACTTTCAGAGACAGCAGAGCACACA<br>AGCTTCTAGGACAAGAGCCAGGAAGAAACCACCGGAAGGAACCATC<br>TCACTGTGTGTAACATGACTTCCAAGCTGGCCGTGGCTCTCTTGG<br>CAGCCTTCTGATTTCTGCAGCTCTGTGTGAAGGTGCAGTTTTGCCA<br>AGGAGTGCTAAAGAACTTAGATGTCAGTGCATAAAGACATACTCCAA<br>ACCTTCCACCCCAAATTTATCAAAGAACTGAGAGTGATTGAGAGTG<br>GACCACACTGCGCCAACACAGAAATTATTGTAAAGCTTTCTGATGGA<br>AGAGAGCTCTGTCTGGACCCCAAGGAAAAGTGGGTGCAGAGGGTT<br>GTGGAGAAGTTTTTGAAGAGGGCTGAGAATTCATAAAAAAATTCATT<br>CTCTGTGGTATCCAAGAATCAGTGAAGATGCCAGTGAAGTTCAGG<br>CAAATCTACTTCAACACTTCATGTATTGTGTGGGTCTGTTGTAGGGT<br>TGCCAGATGCAATACAAGATTCCTGGTTAAATTTGAATTTAGTAAA<br>CAATGAATAGTTTTTTCATTGTACCAGGATCC |
| <i>Oncostatin M</i>           | CTGAGGGGGCTGGGCAGGCGGGGCTTCCCTGCAGACCCTCAATGCC<br>AACTGGGCTGCGTCCTGCACAGACTGGCCGACTTAGAGCAGCGC<br>CTCCCCAAGGCCAGGATTTGGAGAGGTCTGGGCTGAACATCGAG<br>GACTTGGAGAAGCTGCAGATGGCGAGGCCGAACATCCTCGGGCTC<br>AGGAACAACATCTACTGCATGGCCCAGCTGCTGGACAACTCAGACA<br>CGGCTGAGCCCACGAAGGCTGGCCGGGGGGCCTCTCAGCCGCC<br>ACCCCACCCCTGCCTCGGATGCTTTTCAGCGCAAGCTGGAGGGC<br>TGCAGGTTCTGCATGGCTACCATCGCTTCATGCACTCAGTGGGGC<br>GGGTCTTCAGCAAGTGGGGGGAGAGCCCGAACCGGAGCCGGAGA<br>CACAGCCCCACCAGGCCCTGAGGAAGGGGGTGCCGAGGACCAG<br>ACCCTCAGGAAAGGCAAGAGACTCATGACCAGGGGACAGCTGCC<br>CCGGTA                                                                                                                                                 |

**Supplementary Table 11: qPCR performance characteristics**

| <b>Bacteria</b>                       | <b>Tm<br/>(°C)</b> | <b>Efficiency</b> |
|---------------------------------------|--------------------|-------------------|
| <i>B. fragilis</i>                    | 60                 | 0.9742-0.9983     |
| <i>B. thetaiotaomicron</i>            | 60                 | 0.9215-1.0031     |
| <i>E. coli</i>                        | 55                 | 0.933-0.9968      |
| <i>B. longum</i>                      | 60                 | 0.9108-0.9445     |
| <i>B. adolescentis</i>                | 60                 | 0.9815-0.994      |
| <i>E. rectale</i>                     | 60                 | 0.9526-0.9587     |
| <i>R. hominis</i>                     | 60                 | 0.991-1.0198      |
| <i>C. difficile</i> (toxin B)         | 48                 | 0.9153-1.0229     |
| <i>F. prausnitzii</i>                 | 60                 | 0.9492-1.0216     |
| <i>H. sapiens Calprotectin S100A9</i> | 60                 | 1.0278            |
| <i>H. sapiens CXCL5</i>               | 60                 | 1.0297            |
| <i>H. sapiens IL-8</i>                | 60                 | 1.0665            |
| <i>H. sapiens Oncostatin M</i>        | 60                 | 1.0139            |

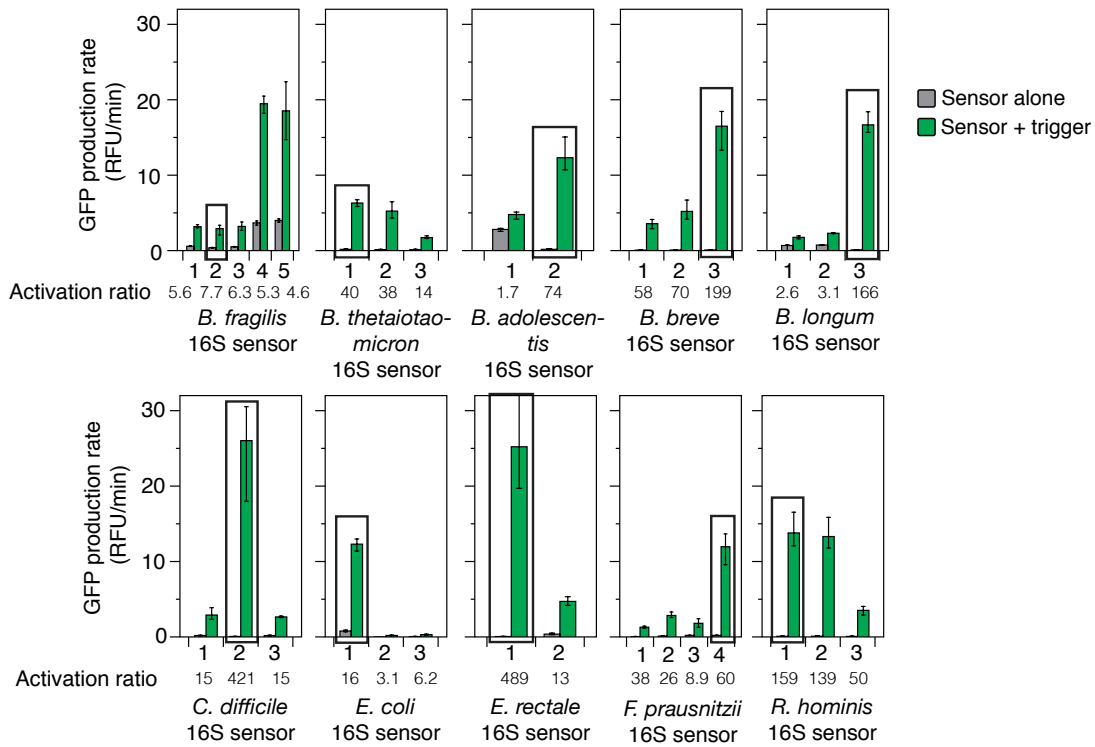

**Supplementary Figure 1.** 16S toehold switch sensor screen. Candidate toehold switch sensors were tested in paper-based reactions with and without 2  $\mu$ M trigger RNA (36 nucleotides). Data represent mean GFP production rates from three technical replicates. Error bars represent high and low values of the three replicates. The activation ratio for each sensor candidate was calculated by dividing the mean 'sensor + trigger' GFP production rate by the mean 'sensor alone' GFP production rate. Sensors were chosen for highest activation ratio and lowest 'sensor alone' GFP production rate. Boxes indicated selected sensors shown in Figure 2b.

SHAPE reactivity from McGinnis et al.

High ■  
 Med ■  
 Low ■

**Primer set 1**

Forward primer

|                         |     |     |     |     |     |     |     |     |     |     |     |     |     |     |     |     |     |     |     |     |     |  |
|-------------------------|-----|-----|-----|-----|-----|-----|-----|-----|-----|-----|-----|-----|-----|-----|-----|-----|-----|-----|-----|-----|-----|--|
| 16S nucleotide position | 334 | 335 | 336 | 337 | 338 | 339 | 340 | 341 | 342 | 343 | 344 | 345 | 346 | 347 | 348 | 349 | 350 | 351 | 352 | 353 | 354 |  |
|                         |     |     |     |     |     |     |     |     |     |     |     |     |     |     |     |     |     |     |     |     |     |  |

Reverse primer

|     |     |     |     |     |     |     |     |     |     |     |     |     |     |     |     |     |     |     |
|-----|-----|-----|-----|-----|-----|-----|-----|-----|-----|-----|-----|-----|-----|-----|-----|-----|-----|-----|
| 519 | 520 | 521 | 522 | 523 | 524 | 525 | 526 | 527 | 528 | 529 | 530 | 531 | 532 | 533 | 534 | 535 | 536 | 537 |
|     |     |     |     |     |     |     |     |     |     |     |     |     |     |     |     |     |     |     |

**Primer set 2**

Forward primer

|     |     |     |     |     |     |     |     |     |     |     |     |     |     |     |     |     |     |     |     |     |     |     |     |
|-----|-----|-----|-----|-----|-----|-----|-----|-----|-----|-----|-----|-----|-----|-----|-----|-----|-----|-----|-----|-----|-----|-----|-----|
| 412 | 413 | 414 | 415 | 416 | 417 | 418 | 419 | 420 | 421 | 422 | 423 | 424 | 425 | 426 | 427 | 428 | 429 | 430 | 431 | 432 | 433 | 434 | 435 |
|     |     |     |     |     |     |     |     |     |     |     |     |     |     |     |     |     |     |     |     |     |     |     |     |

Reverse primer

|     |     |     |     |     |     |     |     |     |     |     |     |     |     |     |     |     |     |     |     |     |     |  |
|-----|-----|-----|-----|-----|-----|-----|-----|-----|-----|-----|-----|-----|-----|-----|-----|-----|-----|-----|-----|-----|-----|--|
| 482 | 483 | 484 | 485 | 486 | 487 | 488 | 489 | 490 | 491 | 492 | 493 | 494 | 495 | 496 | 497 | 498 | 499 | 500 | 501 | 502 | 503 |  |
|     |     |     |     |     |     |     |     |     |     |     |     |     |     |     |     |     |     |     |     |     |     |  |

**Primer set 3**

Forward primer

|     |     |     |     |     |     |     |     |     |     |     |     |     |     |     |     |     |     |     |     |     |     |     |     |
|-----|-----|-----|-----|-----|-----|-----|-----|-----|-----|-----|-----|-----|-----|-----|-----|-----|-----|-----|-----|-----|-----|-----|-----|
| 412 | 413 | 414 | 415 | 416 | 417 | 418 | 419 | 420 | 421 | 422 | 423 | 424 | 425 | 426 | 427 | 428 | 429 | 430 | 431 | 432 | 433 | 434 | 435 |
|     |     |     |     |     |     |     |     |     |     |     |     |     |     |     |     |     |     |     |     |     |     |     |     |

Reverse primer

|     |     |     |     |     |     |     |     |     |     |     |     |     |     |     |     |     |     |     |
|-----|-----|-----|-----|-----|-----|-----|-----|-----|-----|-----|-----|-----|-----|-----|-----|-----|-----|-----|
| 519 | 520 | 521 | 522 | 523 | 524 | 525 | 526 | 527 | 528 | 529 | 530 | 531 | 532 | 533 | 534 | 535 | 536 | 537 |
|     |     |     |     |     |     |     |     |     |     |     |     |     |     |     |     |     |     |     |

**Primer set 4**

Forward primer

|     |     |     |     |     |     |     |     |     |     |     |     |     |     |     |     |     |     |     |     |     |
|-----|-----|-----|-----|-----|-----|-----|-----|-----|-----|-----|-----|-----|-----|-----|-----|-----|-----|-----|-----|-----|
| 407 | 408 | 409 | 410 | 411 | 412 | 413 | 414 | 415 | 416 | 417 | 418 | 419 | 420 | 421 | 422 | 423 | 424 | 425 | 426 | 427 |
|     |     |     |     |     |     |     |     |     |     |     |     |     |     |     |     |     |     |     |     |     |

Reverse primer

|     |     |     |     |     |     |     |     |     |     |     |     |     |     |     |     |     |     |     |     |     |     |
|-----|-----|-----|-----|-----|-----|-----|-----|-----|-----|-----|-----|-----|-----|-----|-----|-----|-----|-----|-----|-----|-----|
| 482 | 483 | 484 | 485 | 486 | 487 | 488 | 489 | 490 | 491 | 492 | 493 | 494 | 495 | 496 | 497 | 498 | 499 | 500 | 501 | 502 | 503 |
|     |     |     |     |     |     |     |     |     |     |     |     |     |     |     |     |     |     |     |     |     |     |

**Supplementary Figure 2.** Chemical structure probing data for *E. coli* 16S NASBA primers. NASBA primers were mapped to SHAPE reactivities of *E. coli* 30S subunits from McGinnis et al<sup>1</sup>. Reactivities indicate the structural accessibility of the individual nucleotides. Increased accessibility for the forward NASBA primer increased amplification efficiency.



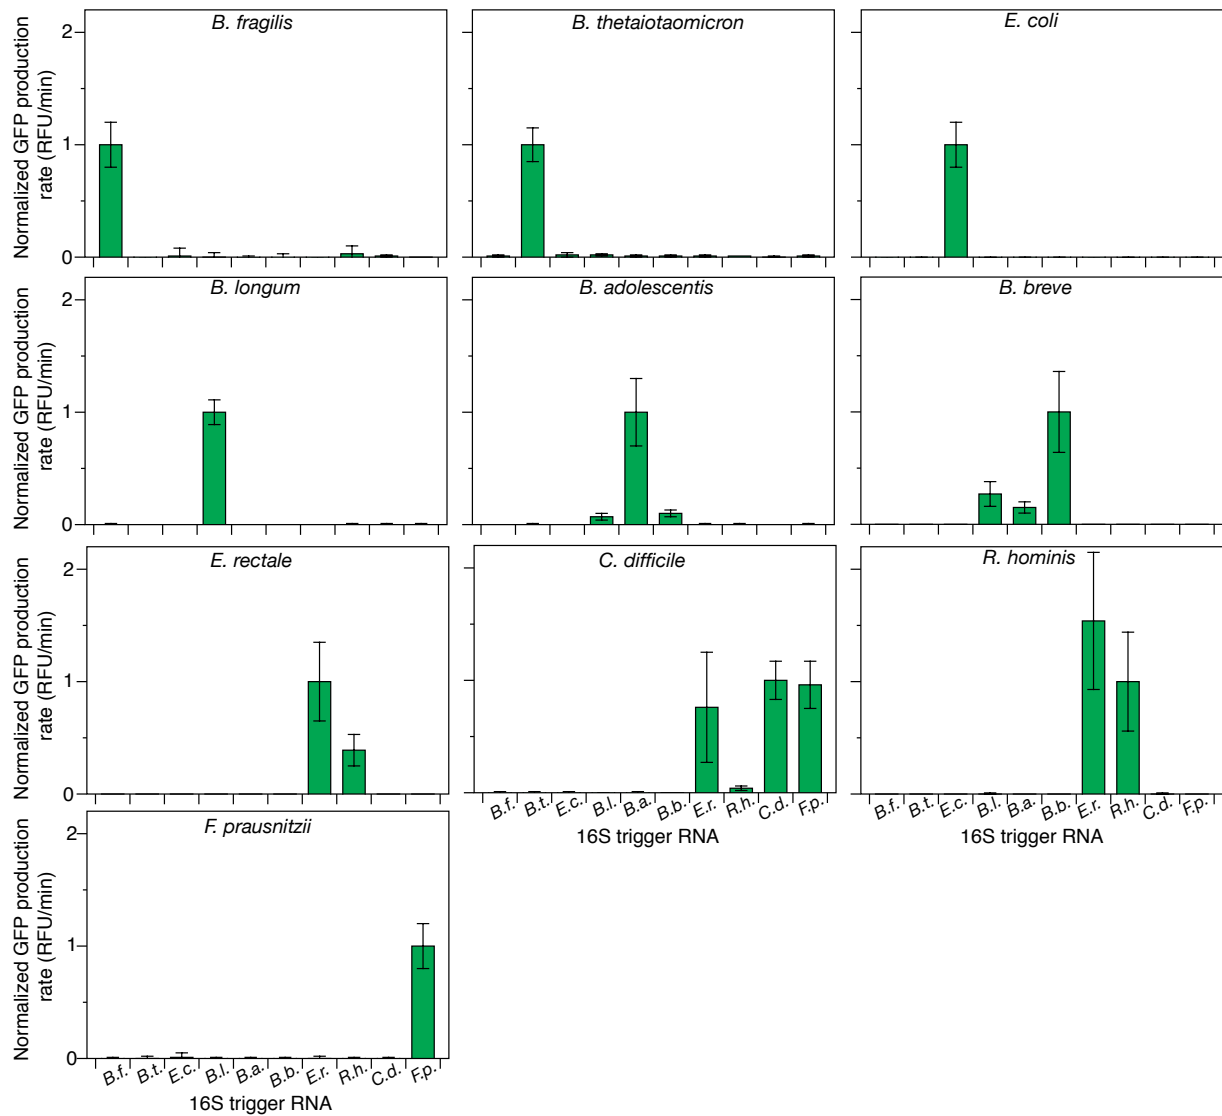

**Supplementary Figure 3.** 16S sensor orthogonality data. These data are represented in Figure 2e. Each sensor was challenged with 2  $\mu$ M of trigger RNAs from each species representing what would be amplified in a NASBA reaction. GFP production rates for an individual sensor were normalized to the production rate of the sensor plus its cognate trigger. Data represent mean  $\pm$  s.d. from six replicates (two biological replicates x three technical replicates).

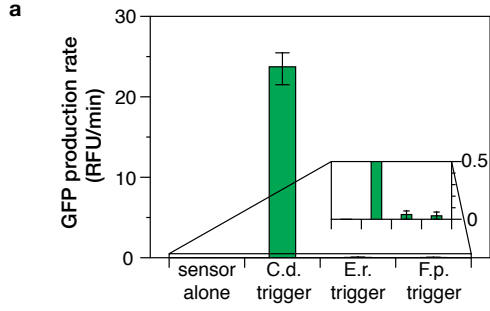

**b**

C. difficile 16S NASBA product  
 ACUCUGUCCUCAAGGAAGAAUUGACGGUACUUGAGGAGGAAGCCCGGCUAACUACGUGCCAGCAGCCGCGGUAUACG  
 AGCGAAGAAGUAAUUCGUAUGUAAGCUCUAUCAGCAGGGAAGAAUUGACGGUACCUAGACUAAGAAGCAC

E. rectale 16S NASBA product

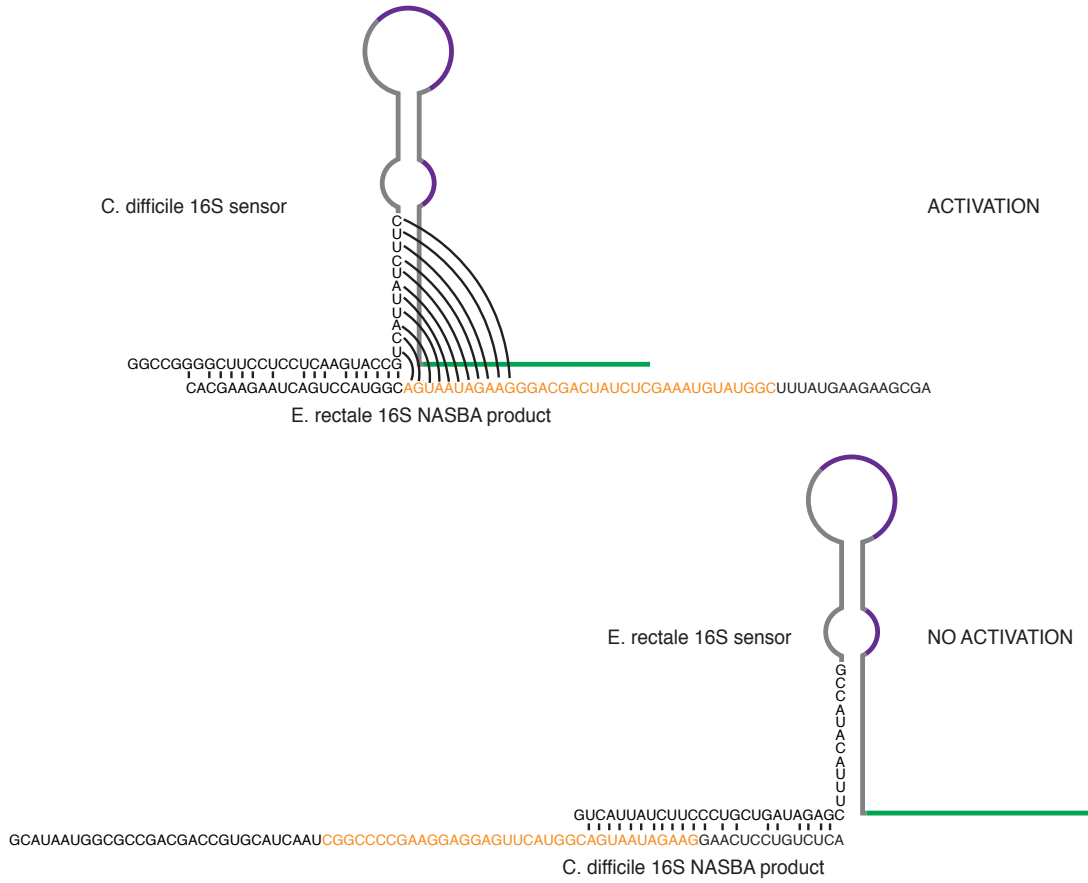

c

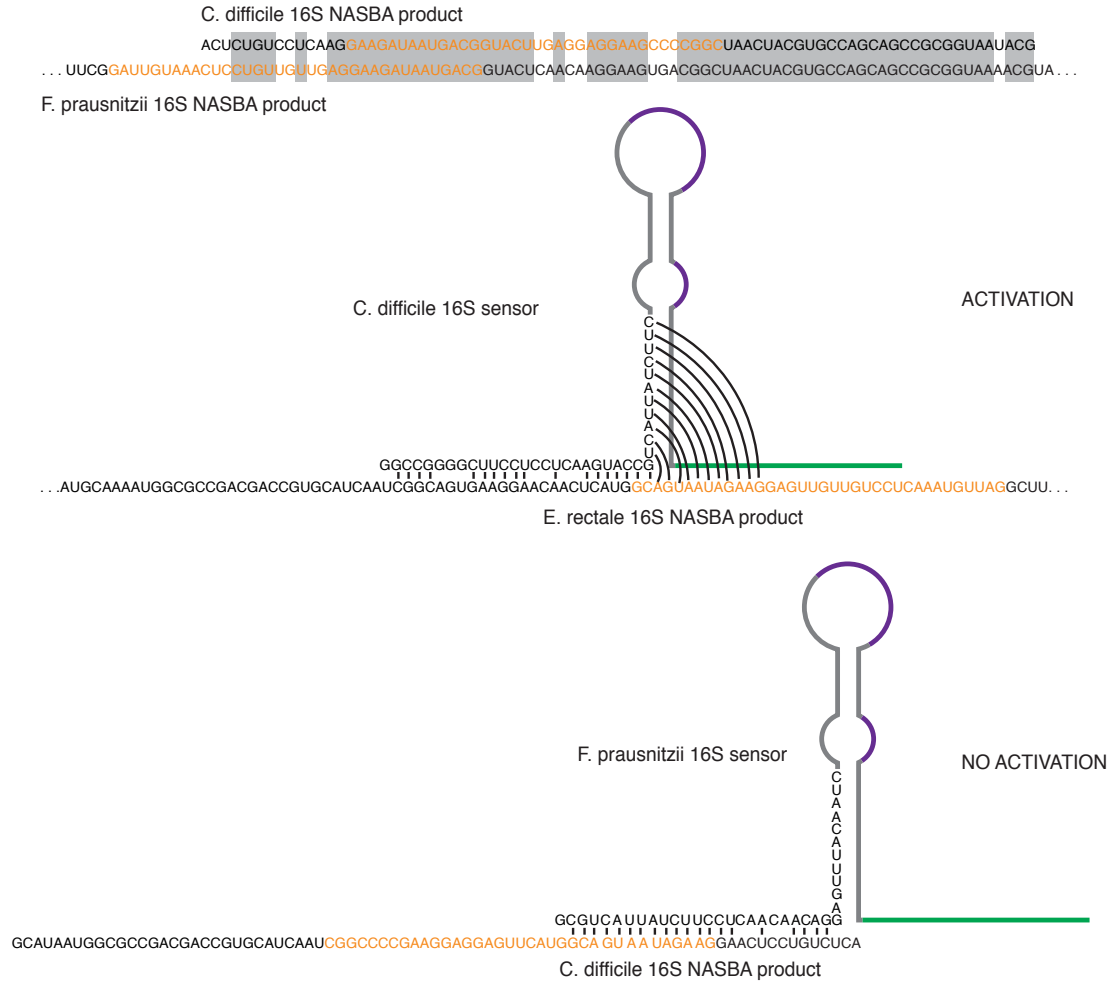

**Supplementary Figure 4.** *C. difficile* 16S sensor alignment. (a) *C. difficile* 16S sensor tested against the *E. rectale* and *F. prausnitzii* 36 nucleotide trigger RNAs (2  $\mu$ M). Data represent mean values from three technical replicates. Error bars represent high and low values of the three replicates. (b) Alignment of the *C. difficile* and *E. rectale* 16S NASBA product. Diagrams indicate theoretical activation of the *C. difficile* sensor by the *E. rectale* product, but no activation of the *E. rectale* sensor by the *C. difficile* product. (c) Alignment of the *C. difficile* and *F. prausnitzii* 16S NASBA product. Diagrams indicate theoretical activation of the *C. difficile* sensor by the *F. prausnitzii* product, but no activation of the *F. prausnitzii* sensor by the *C. difficile* product.

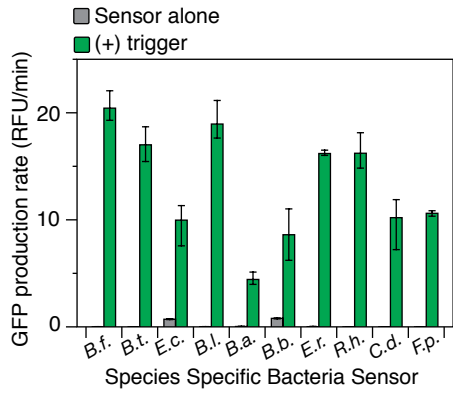

**Supplementary Figure 5.** Species-specific toehold switch sensor function. Best performing species-specific sensors. Sensors were tested in paper-based reactions with and without 2  $\mu$ M trigger RNA (36 nucleotides). Data represent mean values from three technical replicates. Error bars represent high and low values of the three replicates.

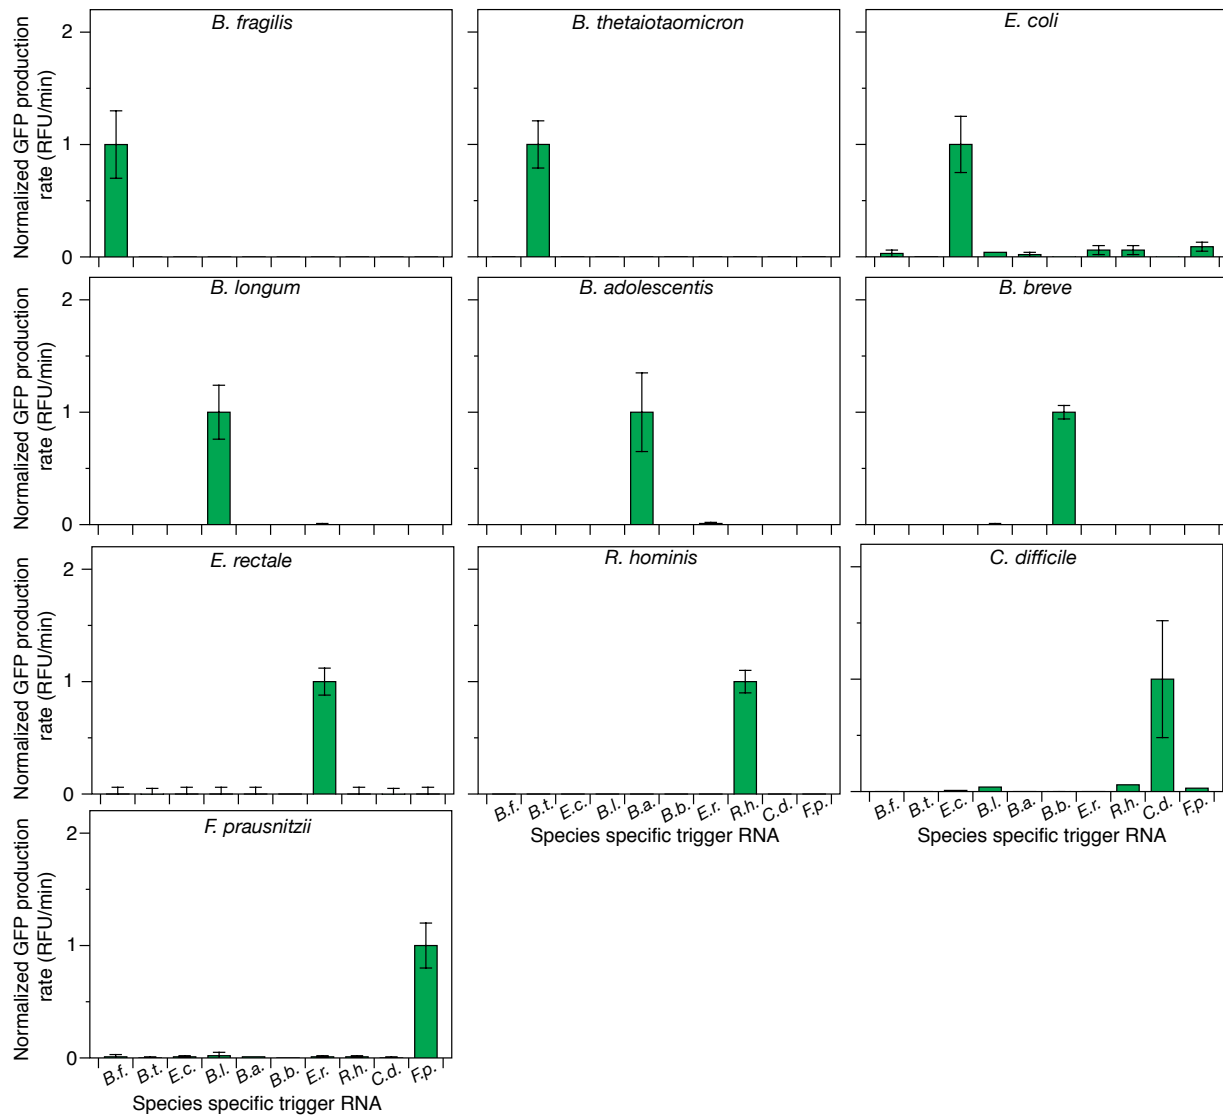

**Supplementary Figure 6.** Species-specific sensor orthogonality. These data are represented in Figure 3c. Each sensor was challenged with 2  $\mu$ M of trigger RNAs from each species representing what would be amplified in a NASBA reaction. GFP production rates for an individual sensor were normalized to the production rate of the sensor plus its cognate trigger. Data represent mean  $\pm$  s.d. from six replicates (two biological replicates x three technical replicates).

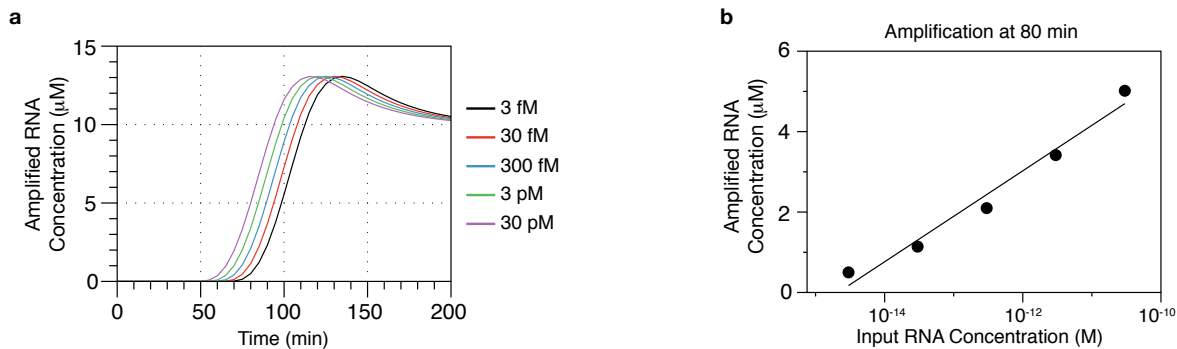

**Supplementary Figure 7.** Mathematical model of NASBA process. Differential equations describing the chemical reactions in NASBA were solved in Matlab (see Supplementary Note). (a) NASBA reaction time courses for varying input mRNA concentrations. The model suggests that mRNA standards ranging between 3 fM and 30 pM could be amplified to  $\mu\text{M}$  RNA concentrations, which is within the detection limit of toehold switch sensors. (b) Input RNA concentration vs. amplified RNA concentration from (a) at the 80-minute time point. The model predicts that if NASBA reactions are stopped before completion, amplified RNA concentrations can be distinguished from one another and quantified using a log-linear fit.

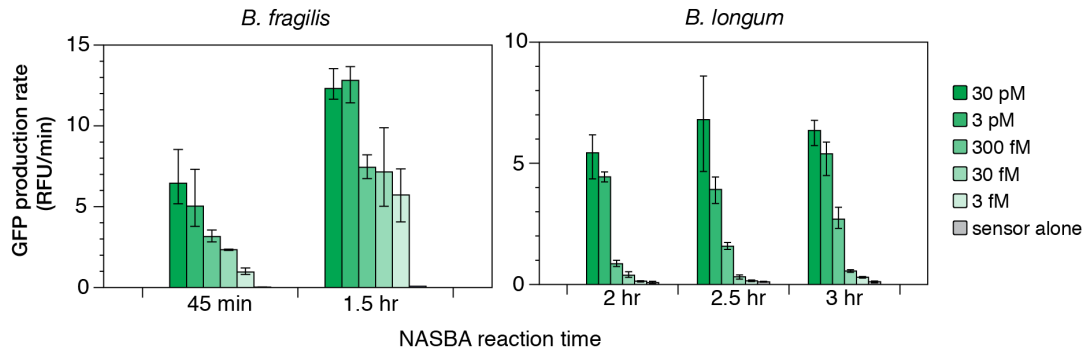

**Supplementary Figure 8.** NASBA time courses. NASBA reactions of varying times were performed on mRNA standards and tested using species-specific mRNA sensors for *B. fragilis* and *B. longum*. Data represent mean values from three technical replicates. Error bars represent high and low values from the three replicates.

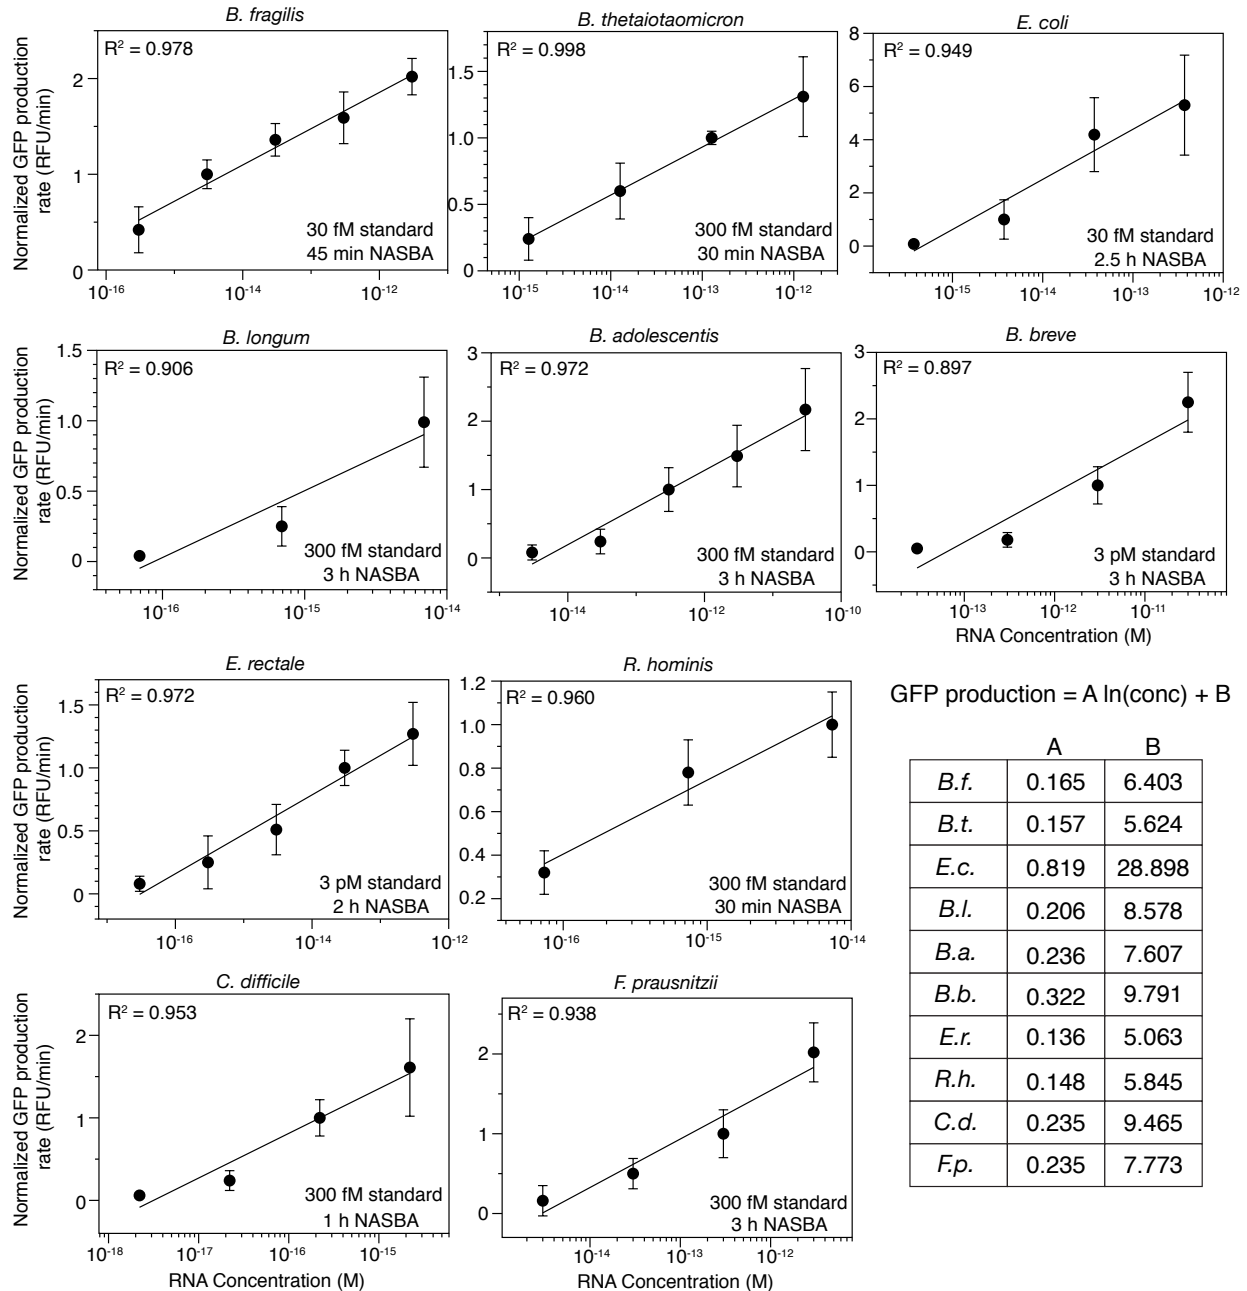

**Supplementary Figure 9.** Species-specific bacterial calibration curves. Species-specific mRNA calibration curves were determined by performing three separate runs of mRNA standards ranging from 3 fM to 30 pM as in Figure 3a. GFP production rates from individual runs were normalized to a single standard. Normalized values for each standard concentration were then averaged across runs and fit to the equation Normalized GFP production = A\*ln(concentration) + B. The x-axis concentrations were then corrected for differences between running standards in yeast tRNA or total stool RNA backgrounds by using standards in stool RNA to calculate the apparent concentration of the normalization standard in yeast tRNA. The NASBA reaction time and normalization standard concentration for each species is indicated in each plot. Data represent mean  $\pm$  s.d. from 27 replicates (nine biological replicates (NASBA reactions) x three technical replicates (paper-based reactions)).



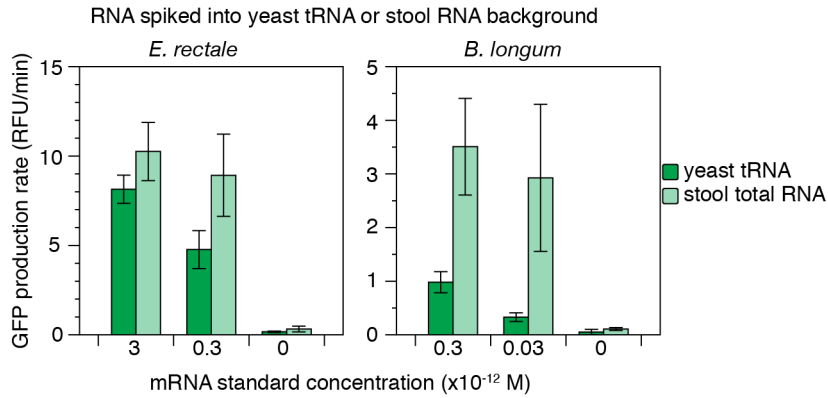

**Supplementary Figure 10.** mRNA detection in stool RNA background. A commercial stool sample was processed for total RNA using the RNeasy PowerMicrobiome kit and diluted to 50 ng/ $\mu$ l. Species-specific mRNA standards were spiked into both yeast tRNA and stool total RNA, and tested in NASBA and paper-based reactions. Data represent mean  $\pm$  s.d. from nine replicates (three biological replicates (NASBA reactions)  $\times$  three technical replicates (paper-based reactions)).

| Clinical sample | Bacteria | Paper-based copies per 50 ng stool RNA | Paper-based error | RT-qpcr copies per 50 ng stool RNA | RT-qpcr error |
|-----------------|----------|----------------------------------------|-------------------|------------------------------------|---------------|
| S1              | B.f.     | 610.3                                  | 173.4             | 11.3                               | 1.7           |
| S1              | B.t.     | 0.0                                    | 0.0               | 0.7                                | 0.1           |
| S1              | E.c.     | 0.0                                    | 0.0               | 0.0                                | 0.0           |
| S1              | B.l.     | 0.0                                    | 0.0               | 0.0                                | 0.0           |
| S1              | B.a.     | 0.0                                    | 0.0               | 0.0                                | 0.0           |
| S1              | R.h.     | 0.0                                    | 0.0               | 0.0                                | 0.0           |
| S1              | F.p.     | 0.0                                    | 0.0               | 1.1                                | 9.6           |
| S2              | B.f.     | 0.0                                    | 0.0               | 0.0                                | 0.0           |
| S2              | B.t.     | 0.0                                    | 0.0               | 0.0                                | 0.0           |
| S2              | E.c.     | 0.0                                    | 0.0               | 0.0                                | 0.0           |
| S2              | B.l.     | 26452.6                                | 5195.7            | 201.7                              | 22.3          |
| S2              | B.a.     | 0.0                                    | 0.0               | 0.0                                | 0.0           |
| S2              | R.h.     | 0.0                                    | 0.0               | 0.0                                | 0.0           |
| S2              | F.p.     | 0.0                                    | 0.0               | 0.0                                | 0.0           |
| S3              | B.f.     | 0.0                                    | 0.0               | 0.0                                | 0.0           |
| S3              | B.t.     | 0.0                                    | 0.0               | 0.0                                | 0.0           |
| S3              | E.c.     | 0.0                                    | 0.0               | 0.0                                | 0.0           |
| S3              | B.l.     | 0.0                                    | 0.0               | 0.0                                | 0.0           |
| S3              | B.a.     | 0.0                                    | 0.0               | 0.0                                | 0.0           |
| S3              | E.c.     | 955.4                                  | 207.1             | 128.7                              | 2.2           |
| S3              | R.h.     | 97867.3                                | 35577.7           | 2885.0                             | 172.8         |
| S3              | F.p.     | 45803.2                                | 14607.6           | 2655.0                             | 247.0         |
| S4              | B.f.     | 0.0                                    | 0.0               | 2.8                                | 1.9           |
| S4              | B.t.     | 0.0                                    | 0.0               | 0.0                                | 0.0           |
| S4              | E.c.     | 0.0                                    | 0.0               | 0.0                                | 0.0           |
| S4              | B.l.     | 0.0                                    | 0.0               | 0.0                                | 0.0           |
| S4              | B.a.     | 0.0                                    | 0.0               | 0.0                                | 0.0           |
| S4              | E.r.     | 0.0                                    | 0.0               | 2.3                                | 0.8           |
| S4              | R.h.     | 62992.0                                | 15645.2           | 3846.7                             | 133.3         |
| S4              | F.p.     | 0.0                                    | 0.0               | 61.3                               | 13.5          |
| S5              | B.f.     | 0.0                                    | 0.0               | 0.0                                | 0.0           |
| S5              | B.t.     | 0.0                                    | 0.0               | 0.0                                | 0.0           |
| S5              | E.c.     | 0.0                                    | 0.0               | 0.0                                | 0.0           |
| S5              | B.a.     | 0.0                                    | 0.0               | 0.0                                | 0.0           |
| S5              | E.r.     | 46.0                                   | 0.9               | 8.2                                | 1.9           |
| S5              | R.h.     | 0.0                                    | 0.0               | 0.0                                | 0.0           |
| S5              | F.p.     | 0.0                                    | 0.0               | 0.6                                | 7.4           |
| S6              | B.f.     | 0.0                                    | 0.0               | 0.0                                | 0.0           |
| S6              | B.t.     | 0.0                                    | 0.0               | 0.0                                | 0.0           |
| S6              | E.c.     | 0.0                                    | 0.0               | 0.0                                | 0.0           |
| S6              | B.l.     | 0.0                                    | 0.0               | 0.0                                | 0.0           |
| S6              | B.a.     | 6451.0                                 | 361.2             | 40.6                               | 4.9           |
| S6              | R.h.     | 0.0                                    | 0.0               | 0.0                                | 0.0           |
| S6              | F.p.     | 0.0                                    | 0.0               | 0.0                                | 0.0           |

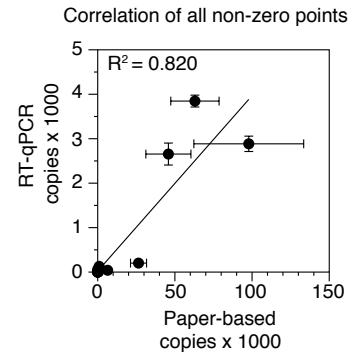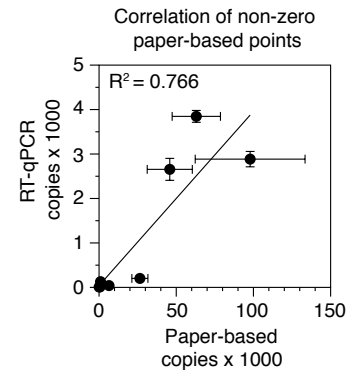

**Supplementary Figure 11.** Quantification of species-specific mRNAs in clinical samples. These data are represented in Figure 4d-e. Table indicates mean values and s.d. of data included in the color-map in Figure 4d. Highlighted values were used in the upper-correlation plot. Only non-zero values as determined by the paper-based system were used in the lower-correlation plot. Paper-based error bars represent s.d. from nine replicates (three biological replicates (NASBA reactions) x three technical replicates (paper-based reactions)). RT-qPCR error bars represent s.d. from six replicates (two biological replicates (RT reactions) x three technical replicates (qPCR reactions)).

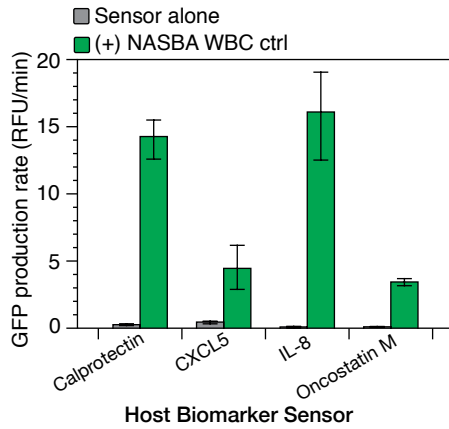

**Supplementary Figure 12.** Host biomarker sensor and NASBA primer validation. Host biomarker sensors and NASBA primers were tested on total RNA extracted from human white blood cells (WBC ctrl, Takara Bio 636592). Outputs from NASBA reactions were used to activate toehold switch sensors in paper-based reactions. Data represent mean values of three technical replicates. Error bars represent high and low values of the three replicates.

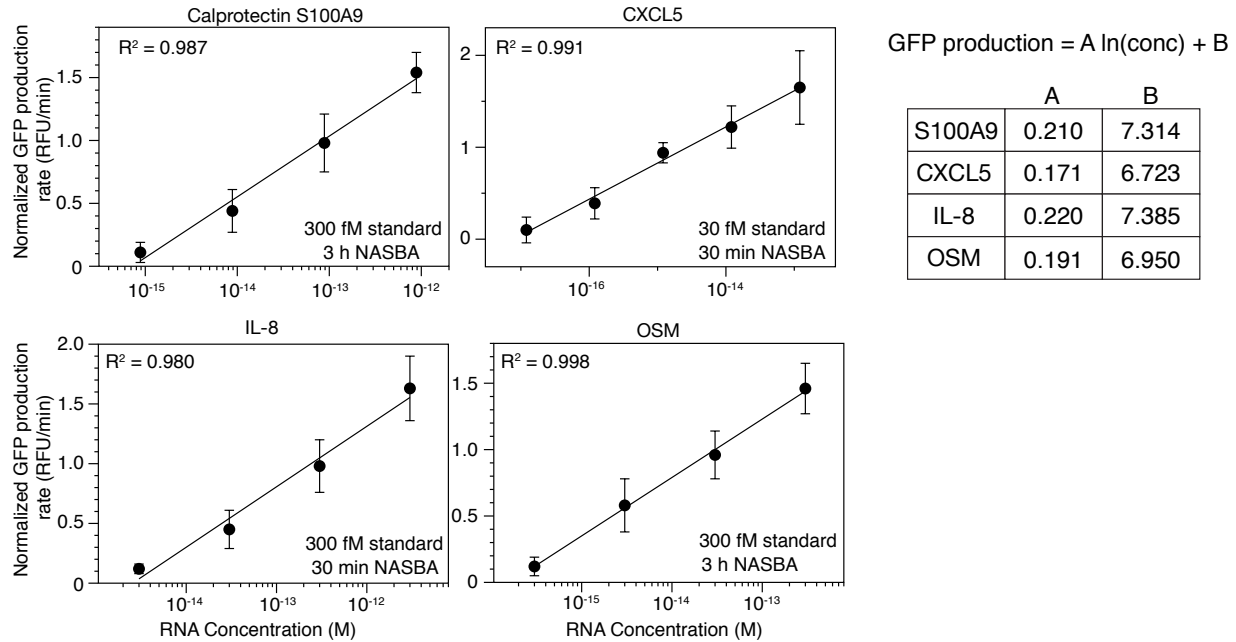

**Supplementary Figure 13.** Host biomarker calibration curves. Host biomarker mRNA calibration curves were determined by performing three separate runs of mRNA standards ranging from 3 fM to 30 pM. GFP production rates from individual runs were normalized to a single standard. Normalized values for each standard concentration were then averaged across runs and fit to the equation Normalized GFP production =  $A \cdot \ln(\text{concentration}) + B$ . The x-axis concentrations were then corrected for differences between running standards in yeast tRNA or total stool RNA backgrounds by using standards in stool RNA to calculate the apparent concentration of the normalization standard in yeast tRNA. The NASBA reaction time and normalization standard concentration for each species is indicated in each plot. Data represent  $\pm$  s.d. from 27 replicates (nine biological replicates (NASBA reactions) x three technical replicates (paper-based reactions)).

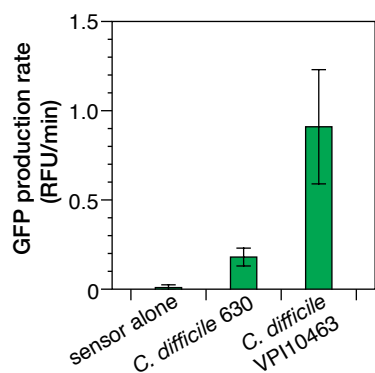

**Supplementary Figure 14.** *C. difficile* toxin sensor and NASBA validation. Toxin B sensor and NASBA primers were tested on total RNA extracted from cultures of *C. difficile* 630 and *C. difficile* VPI 10463. NASBA reactions were performed on 25 ng of total RNA for 3 hr. Outputs from NASBA reactions were used to activate toehold switch sensors in paper-based reactions. Data represent mean  $\pm$  s.d. from nine replicates (three biological replicates (NASBA reactions) x three technical replicates (paper-based reactions)).

**Supplementary Table 12.** *C. difficile* toxin DNA qPCR results. Samples from Figure 6c were tested for toxin B DNA using the qPCR primers in Supplementary Table 8. ND = not determined. Any sample with Cq < 40 was considered positive.

| <b>Sample</b> | <b>Cq<br/>mean</b> | <b>Cq<br/>error</b> |
|---------------|--------------------|---------------------|
| stool zero    | ND                 | ND                  |
| 630, M1       | 30.53              | 0.1                 |
| 630, M2       | 30.71              | 0.15                |
| VPI, M1       | 28.75              | 0.05                |
| VPI, M2       | 30.78              | 0.04                |

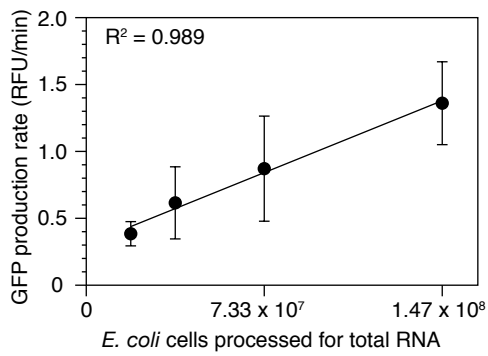

**Supplementary Figure 15.** Correlation of *E. coli* species-specific mRNA to cell count. Varying amounts of *E. coli* cells ( $1.83 \times 10^7 - 1.47 \times 10^8$ ) were processed for total RNA and tested in NASBA and paper-based reactions. Processed total RNA was diluted 1:50 in 50 ng/ $\mu$ l yeast tRNA prior to NASBA reactions. Data represent mean  $\pm$  s.d. from nine replicates (three biological replicates (NASBA reactions)  $\times$  three technical replicates (paper-based reactions)).

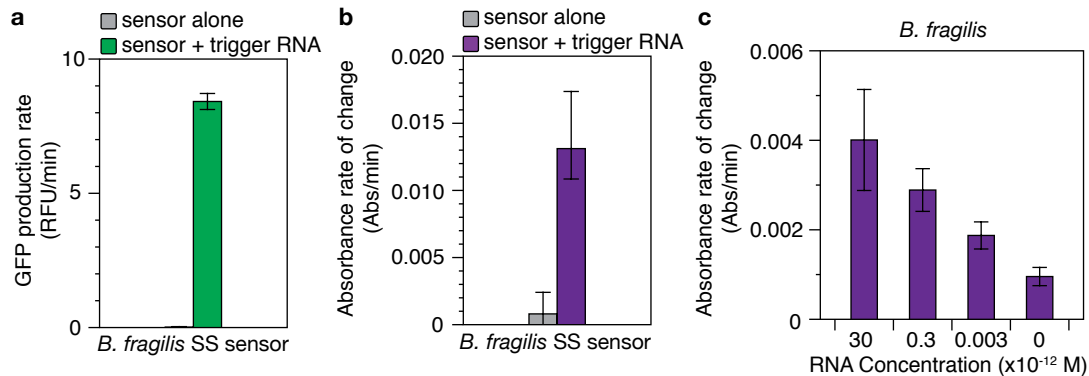

**Supplementary Figure 16.** Demonstration of platform using an in-house cell-free system. In-house cell-free extract and buffer were prepared (see Methods) and used to test toehold switch sensors. (a) The *B. fragilis* species-specific sensor was tested in paper-based reactions with and without 2  $\mu$ M trigger RNA (36 nucleotides). Whatman GF/F glass fiber substrate (Whatman 1825047) was used instead of the standard paper substrate (Whatman, 1442-042) due to high background autofluorescence of the cell-free extract on the standard paper. (b) As a demonstration of the flexibility of the platform, toehold switch sensors were used to regulate the translation of the LacZ enzyme. The *B. fragilis* species-specific sensor was tested in paper-based reactions with and without 2  $\mu$ M trigger RNA (36 nucleotides). (c) NASBA reactions were performed on *B. fragilis* mRNA standards for 45 min and tested in paper-based reactions. In (a) and (b) data represent mean of three technical replicates and error bars represent the high and low values of the three replicates. In (c) data represent mean of nine replicates (three biological replicates (NASBA reactions)  $\times$  three technical replicates (paper-based reactions)) and error bars represent s.d.



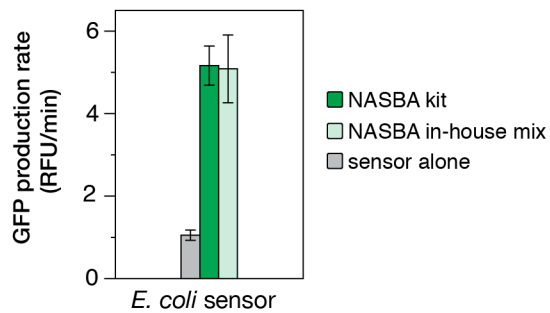

**Supplementary Figure 17.** Performance of NASBA reactions using individually mixed components. NASBA reactions were run on the 30 pM *E. coli* species-specific mRNA standard for 90 minutes and tested in paper-based reactions. Data represent mean  $\pm$  s.d. of six replicates (two biological replicates (NASBA reactions) x three technical replicates (paper-based reactions)).



**Supplementary Note 2.** Description of NASBA Mathematical Model.

To model NASBA reactions, we assumed each reaction followed standard mass-action Michaelis-Menten kinetics. NASBA enzymes bind their cognate ligand with an affinity  $K_D$  to form a complex and produce a product at a rate of  $k_{cat}$ . The concentration of each species in the system was calculated for each time step by solving a series of differential equations that describes the change in concentration of each species over time. The differential equations describing enzyme kinetics are nonlinear by nature and thus were solved numerically. The differential equations were solved in Matlab using a stiff ODE solver with an error tolerance of  $1e^{-13}$ .

Model species: Initial concentrations reflect concentrations used in experimental reactions.

| Species Name          | Symbol             | Initial Concentration |
|-----------------------|--------------------|-----------------------|
| mRNA                  | <i>mRNA</i>        | 1 pM                  |
| Primer 1              | <i>P1</i>          | 250 nM                |
| mRNA-Primer1          | <i>mRNA-P1</i>     | 0                     |
| Reverse Transcriptase | <i>RT</i>          | 1 nM                  |
| mRNA-Primer1-RT       | <i>mRNA-P1-RT</i>  | 0                     |
| Complexed ssDNA/RNA   | <i>C</i>           | 0                     |
| RNAse H               | <i>H</i>           | 0.05 nM               |
| Complex-RNAse H       | <i>C-H</i>         | 0                     |
| Single-stranded DNA   | <i>ssDNA</i>       | 0                     |
| Primer 2              | <i>P2</i>          | 250 nM                |
| ssDNA-Primer 2        | <i>ssDNA-P2</i>    | 0                     |
| T7 RNAP               | <i>T7</i>          | 5 nM                  |
| ssDNA-Primer 2- RT    | <i>ssDNA-P2-RT</i> | 0                     |
| Double-stranded DNA   | <i>dsDNA</i>       | 0                     |
| dsDNA-T7 RNAP         | <i>dsDNA-T7</i>    | 0                     |
| dNTP                  | <i>dNTP</i>        | 20000 nM              |
| NTP                   | <i>NTP</i>         | 10000 nM              |
| Background RNA        | <i>bkRNA</i>       | 700 nM                |
| Background-Primer1    | <i>bkRNA-P1</i>    | 0                     |
| Background-Primer 2   | <i>bkRNA-P2</i>    | 0                     |

Reaction rates: Rate constants were obtained from Bionumbers (<http://www.bionumbers.hms.harvard.edu/>)

| Name              | Symbol        | Value                                         |
|-------------------|---------------|-----------------------------------------------|
| Primer Binding    | $k_p$         | $10^6$                                        |
| Primer Unbinding  | $k_p^{-1}$    | $10^{-4}$                                     |
| RT Binding        | $k_{rt}$      | $10^6$                                        |
| RT Unbinding      | $k_{rt}^{-1}$ | $10^{-4}$                                     |
| Synthesis         | $k_{syn}$     | 0.0005 nM s <sup>-1</sup> (based on turnover) |
| RNAse H Binding   | $k_h$         | $10^5$                                        |
| RNAse H Unbinding | $k_h^{-1}$    | $10^{-4}$                                     |

|                      |               |                                              |
|----------------------|---------------|----------------------------------------------|
| T7 Binding           | $k_{t7}$      | $10^5$                                       |
| T7 Unbinding         | $k_{t7}^{-1}$ | $10^{-4}$                                    |
| Degradation          | $k_{deg}$     | $0.05 \text{ nM s}^{-1}$ (based on turnover) |
| Background Binding   | $k_{pb}$      | $5 \cdot 10^5$                               |
| Background Unbinding | $k_{pb}^{-1}$ | $10^{-4}$                                    |

## Chemical Reactions

Supplementary Equation 1

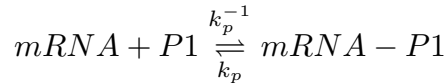

Supplementary Equation 2

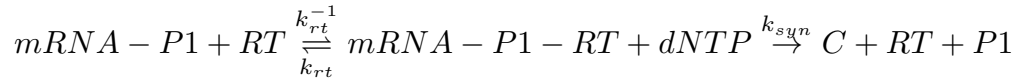

Supplementary Equation 3

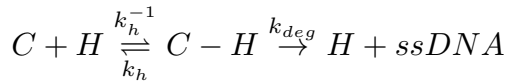

Supplementary Equation 4

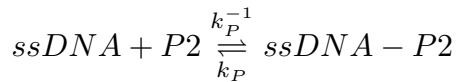

Supplementary Equation 5

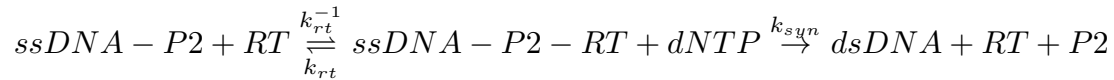

Supplementary Equation 6

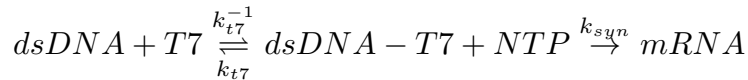

## Differential Equations

Supplementary Equation 7: Free mRNA

$$\frac{d[mRNA]}{dt} = k_p^{-1}[mRNA - P1] + k_{syn}[T7][dsDNA][NTP] - k_p[mRNA][P1]$$

Supplementary Equation 8: Free Primer 1

$$\frac{d[P1]}{dt} = k_p^{-1}[mRNA - P1] + k_{syn}[dNTP][mRNA - P1 - RT] - k_p[mRNA][P1] - k_{pb}[bkRNA][P1] + k_{pb}^{-1}[bkRNA - P1]$$

Supplementary Equation 9: Complexed mRNA-Primer1

$$\frac{d[mRNA - P1]}{dt} = k_p[mRNA][P1] - k_p^{-1}[mRNA - P1] - k_{rt}[mRNA - P1][RT] + k_{rt}^{-1}[mRNA - P1 - RT]$$

Supplementary Equation 10: Free Reverse Transcriptase

$$\frac{d[RT]}{dt} = k_{rt}^{-1}[mRNA - P1 - RT] + k_{syn}[dNTP][mRNA - P1 - RT] - k_{rt}[mRNA - P1][RT] - k_{rt}[ssDNA - P1][RT] + k_{rt}^{-1}[ssDNA - P2 - RT] + k_{syn}[dNTP][ssDNA - P2 - RT]$$

Supplementary Equation 11: Complexed mRNA-P1-RT

$$\frac{d[mRNA - P1 - RT]}{dt} = k_{rt}[mRNA - P1][RT] - k_{rt}^{-1}[mRNA - P1 - RT] - k_{syn}[dNTP][mRNA - P1 - RT]$$

Supplementary Equation 12: mRNA-ssDNA Complex

$$\frac{d[C]}{dt} = k_{syn}[dNTP][mRNA - P1 - RT] + k_h^{-1}[C - H] - k_h[H][C]$$

Supplementary Equation 13: RNase H

$$\frac{d[H]}{dt} = k_h^{-1}[C - H] + k_{deg}[C - H] - k_h[H][C]$$

Supplementary Equation 14: Complexed mRNA-ssDNA-RNase H

$$\frac{d[C - H]}{dt} = k_h[C][H] - k_h^{-1}[C - H] - k_{deg}[C - H]$$

Supplementary Equation 15: ssDNA

$$\frac{d[ssDNA]}{dt} = k_p^{-1}[ssDNA - P2] - k_p[ssDNA][P2] + k_{deg}[C - H]$$

Supplementary Equation 16: Free Primer 2

$$\frac{d[ssDNA]}{dt} = k_p^{-1}[ssDNA - P2] - k_p[ssDNA][P2] + k_{pb}^{-1}[bkRNA - P2] - k_{pb}[bkRNA][P2] + k_{syn}[ssDNA - P2 - RT][dNTP]$$

Supplementary Equation 17: Complexed ssDNA-P2

$$\frac{d[ssDNA - P2]}{dt} = k_p[ssDNA][P2] - k_p^{-1}[ssDNA - P2]k_{rt}[ssDNA - P2][RT] + k_{rt}^{-1}[ssDNA - P2 - RT]$$

Supplementary Equation 18: Free T7 RNAP

$$\frac{d[T7]}{dt} = k_{t7}^{-1}[dsDNA - T7] - k_{t7}[dsDNA][T7]$$

Supplementary Equation 19: Complexed ssDNA-P2-RT

$$\frac{d[ssDNA - P2 - RT]}{dt} = k_{rt}[ssDNA - P2][RT] - k_{rt}^{-1}[ssDNA - P2 - RT] - k_{syn}[ssDNA - P2 - RT][dNTP]$$

Supplementary Equation 20: Free dsDNA

$$\frac{d[dsDNA]}{dt} = k_{syn}[ssDNA - P2 - RT][dNTP] + k_{t7}^{-1}[dsDNA - T7] - k_{t7}[dsDNA][T7]$$

Supplementary Equation 21: Complexed dsDNA-T7

$$\frac{d[dsDNA - T7]}{dt} = k_{t7}[dsDNA][T7] - k_{t7}^{-1}[dsDNA - T7]$$

Supplementary Equation 22: dNTP

$$\frac{d[dNTP]}{dt} = -k_{syn}[dNTP][mRNA - P1 - RT] - k_{syn}[dNTP][ssDNA - P2 - RT]$$

Supplementary Equation 23: NTP

$$\frac{d[NTP]}{dt} = -k_{syn}[NTP][dsDNA - T7]$$

Supplementary Equation 24: Background RNA

$$\frac{d[bkRNA]}{dt} = k_{pb}^{-1}[bkRNA - P1] + k_{pb}^{-1}[bkRNA - P2] - k_{pb}[bkRNA][P1] - k_{pb}[bkRNA][P2]$$

Supplementary Equation 25: Complexed Background-P1

$$\frac{d[bkRNA - P1]}{dt} = k_{pb}[bkRNA][P1] - k_{pb}^{-1}[bkRNA - P1]$$

Supplementary Equation 26: Complexed Background-P2

$$\frac{d[bkRNA - P2]}{dt} = k_{pb}[bkRNA][P2] - k_{pb}^{-1}[bkRNA - P2]$$

## Supplementary References

1. McGinnis, J. L. *et al.* In-cell SHAPE reveals that free 30S ribosome subunits are in the inactive state. *Proc. Natl. Acad. Sci. U. S. A.* **112**, 2425–2430 (2015).
